## **Combined use of *Candida Utilis* and *Idesia polycarpa* var. *Vestita***

### **Fruit Improve the Production Performance of Laying Quail**

Xinanbei Liu<sup>\*,†</sup>; Na Li<sup>\*,†</sup>; Yueyue Shu<sup>\*,†</sup>; Yiran Sun<sup>\*,†</sup>; Yu Li<sup>\*,†</sup>; Wan Hua<sup>\*,†</sup>;

Yang Ye<sup>\*,†</sup>; Fang Chen<sup>\*,†</sup>; Lin Tang<sup>\*,†,1</sup>

\* Key laboratory of Bio-Resources and Eco-Environment of Ministry of Education,  
College of Life sciences, Sichuan University, Chengdu 610064, P.R.China;

† National and Local Joint Engineering Laboratory for Energy Plant Bio-oil  
Production and Application, Chengdu 610064, China

<sup>1</sup>**Corresponding Author:** Key laboratory of Bio-resources and Eco-environment of  
Ministry of Education, college of Life sciences, Sichuan University, Chengdu 610064,  
P. R. China. Email: [tanglin@scu.edu.cn](mailto:tanglin@scu.edu.cn) (L. Tang). Tel: (028) 8541 7281

**Abbreviated Title:** A new feeding raw material applying on laying quails.

1 **ABSTRACT:** *Idesia polycarpa* Maxim. var. *vestita* Diels (*Idesia polycarpa*), which is  
2 widely distributed in south China, is still underexplored. This study applied *Idesia*  
3 *polycarpa* defatted fruit (IPF) and *Candida utilis* to the feed of laying quails using  
4 solid-state fermentation. In comparison to the standard diet group, birds fed with  
5 mixture of IPF and *candida utilis* (MIC) showed better production capacity, and the  
6 ML group (1% MIC added) achieved the greatest egg mass (9.77 on average;  $P<0.01$ )  
7 and laying rate (87.7% on average;  $P<0.01$ ). Compared to the standard diet group, the  
8 cholesterol content was lower in both the ML (1% MIC addition groups) and IL (1%  
9 IPF addition groups), and 5% MIC added group had higher n-3 polyunsaturated fatty  
10 acid content. Furthermore, birds given the MIC dietary supplement showed a thicker  
11 jejunum wall than the standard diet group. In addition, the related mRNA expression  
12 of SRBEP-1, SREBP-2, ATGL, APOVLDL-II which are involved in the fatty acid and  
13 cholesterol biosynthesis suggested that the addition of *candida utilis* could effectively  
14 improve the production capacity of laying quails while decrease the negative effects  
15 of IPF. This work also demonstrates how MIC can be applied to improve the  
16 production of laying quails.

17 **KEYWORDS:** *Candida utilis*, *Idesia polycarpa* fruit, Laying quails, Egg  
18 production,.

## Introduction

19 *Idesia polycarpa* (*Idesia polycarpa* Maxim. var. *vestita* Diels) is widely  
20 distributed in south China, and it is known for its high-quality edible oil, which has a  
21 high content of conjugated linoleic acid (CLA). Moreover, the application of *Idesia*  
22 *polycarpa* oil in biodiesel production has been demonstrated (1, 2). There have been  
23 several studies on *Idesia polycarpa* fruit, including functional research on *Idesia*  
24 *polycarpa* fruit extraction and studies on the improvement of the extraction process.  
25 The remarkable antioxidant qualities, anti-skin-aging ability (3) and anti-adipogenic  
26 ability (4) of *Idesia polycarpa* extracts have been demonstrated, and an optimized  
27 extraction method has also been established (5). However, reports on the application  
28 of *Idesia polycarpa* fruit for the other purposes are still limited. In this study, we are  
29 tried to apply *Idesia polycarpa* defatted fruit (IPF) in laying quail's breeding, and for  
30 purpose of effective use, solid-fermentation was selected.

31 From a historical perspective, phytogetic materials fermented with specific  
32 microbe are recognized to benefit farm animals and are described as far back as the  
33 beginning of the last century (6, 7). Even now, fermentation is still gaining interest  
34 because of its important role in the production of quality feed and the utilization of  
35 unexploited feed materials (8, 9). Moreover, based on existing studies, the addition of  
36 probiotic could effectively decrease anti-nutritive factors and allergenic proteins (10,  
37 11). Furthermore, fermented feed represents a plausible alternative to traditional  
38 antibiotics, as it enhances a number of important processes in animals (12, 13).

39 *Candida utilis* is an important member of edible yeast, which has safely been

40 used as a food or feed additive in food and feed industry for years. *Candida utilis* is  
41 able to robust growth on inexpensive nitrogen and carbon sources, such as pentoses  
42 (14). The main product of *Candida utilis* is single-cell protein, which has excellent  
43 nutritional properties and has an agreeable odor and flavor, and this odor and flavor  
44 can also be conferred to product by fermentation (15, 16). Therefore, *Candida utilis*  
45 is a good choice in our study.

46 As an important product in the poultry industry, quail eggs are gaining increasing  
47 interest thanks to their good taste, health benefits and nutrient richness(17, 18). In  
48 addition, as a sensitive experimental animal (19), *Coturnix japonica* and its eggs are  
49 often used in research (20).The effects of various kinds of materials have been tested  
50 on the production of quail eggs, for instance, soybean (21), cassava meal (22), and  
51 sunflower meal (23). However, no reports are available regarding the effects of *Idesia*  
52 *polycarpa* products on the quality of quail eggs.

53 In this study, mixture of IPF and *candida utilis* (MIC) was added to the feed of  
54 laying quails as a probiotic additive. Production capacity, health performance and egg  
55 quality of laying quails were analysed during or after the feeding phase. Moreover, the  
56 relative mRNA expression level of SRBEP-1, SREBP-2, ATGL, APOVLDL-II which  
57 are involved in the fatty acid and cholesterol biosynthesis are measured.

## 58 Materials and methods

### 59 Probiotic and Feed

60 *Candida utilis* was purchased from China Center of Industrial Culture Collection

61 (31170, CICC).

62 *Idesia polycarpa* defatted fruits (IPF) which obtained by physical cold pressing  
63 process were kindly supplied by Agriculture Bureau of Jianyang, China, and  
64 processed into a dried powder before it be used.

65 Mixture of *Idesia polycarpa* defatted fruits and *Candida utilis* (MIC) was  
66 produced by a solid fermentation method (solid-liquid ration 1:1.2; ammonium nitrate  
67 8.5%; inoculum size 10.5% (*Candida utilis* in suspension form,  $1.0 \times 10^7$  colony  
68 forming units (cfu)/ml); temperature 30°C; time 4d;), and processed into a dried  
69 powder before it be used.

70 Basal feed (BD, Tequ302, Sichuan) in powder form which contains all nutrients  
71 necessary for animals was purchased in the local market. Nutrients of MIC, IPF and  
72 basal diet are shown in **Table 1**.

### 73 **Birds and Experimental Design**

74 All animal protocols were approved by the Sichuan University animal Care and  
75 Use committee. A total of 250 layer quails (*Coturnix coturnix japonica*, 90 days old)  
76 from a local breeding farm (Chengdu, China) were randomly divided into 5 groups:  
77 Control, base diet only; MH, basal diet supplemented with 5% MIC; ML, basal diet  
78 supplemented with 1% MIC; IH, basal diet supplemented with 5% IPF; IL, basal diet  
79 supplemented with 1% IPF. All birds were kept in a room with a relatively stable  
80 temperature (24-30 °C) and humidity (65%). During the 8-week experimental period,  
81 birds had access to water *ad libitum*, but with a fixed amount of diet (1,000 g/d,  
82 equivalent to a dose of 20 g/d/bird), which based on the local farm feeding  
83 management for this season. In addition, from week 0 to 2, a trace amount of MIC  
84 (0.5g (0.05%) per day) was added into the daily diet of each group to help quails

85 adaptation to the peculiar smell of the feed, except the control group. The quail's  
86 differentiated diet was supplied during the 6 weeks feeding test period from week 3 to  
87 week 8. The feeding experimental design is shown in **Table 2**.

## 88 **Sample collection**

89 The number of eggs was counted every day, and the results are represented as the  
90 mean value of each week. Eggs were randomly collected (five eggs from each group,  
91 30 eggs in total) each week to measure the egg quality during the experimental period.  
92 The egg weight, density, and axis ratio, as well as the egg yolk weight and the ratio  
93 between the egg weight and egg yolk weight were measured. The Haugh unit values  
94 were calculated using the Haugh unit formula based on egg weight and albumen  
95 height, as determined using a Vernier caliper. The eggshell thickness and membrane  
96 thickness were determined as the mean value of measurements taken at three locations  
97 on the egg (sharp end, blunt end, and middle section).

98 The egg yolk samples were separated from the rest of the egg for triglyceride and  
99 cholesterol determination on weeks 6 to 8. The yolk triglycerides and cholesterol were  
100 determined using ELISA (SMP500-15859-SBRE, Molecular Devices, USA) using  
101 commercial kits according to the manufacturer's protocol (Jiancheng, Nanjing, China).  
102 On week 8, three additional eggs/each group were collected for yolk lipid extraction.

103 At the end of the Phase 2 (week 8), three quails in each group were randomly  
104 sacrificed by cervical dislocation for sample collection after weighing. Tissue samples,  
105 including those from the intestine, interclavicular fat pad and liver, were immediately

106 collected from all 15 quails after they were sacrificed. The same segment of the  
107 intestine was collected and stored in a prepared fixative (10% formalin) for histology  
108 analysis, the fat pads were immediately weighed, and both the fat pad and liver  
109 samples were snap-frozen in liquid nitrogen and stored at -80 °C until the subsequent  
110 RNA isolation.

### 111 **Yolk lipid extraction**

112 Yolk samples were separated from boiled eggs. Yolk lipids were extracted from  
113 three yolks in each group using hexane extraction (AOAC 2003. 06). The extracted  
114 yolk lipids were stored in -20 °C until the subsequent fatty acids analysis.

### 115 **Methylation and GC/MS**

116 The methylation of the yolk lipids was determined using the alkali catalysis  
117 method (24). The peak area and fatty acid percentages were calculated using the  
118 GCMS-solution software (Shimadzu, Japan), and the fatty acid methyl esters are  
119 expressed as the percentage of the total fatty acids.

### 120 **Jejunum morphology**

121 After being fixed in 10% formalin for 24 h, samples of the jejunum tissues were  
122 selected for 5 µm-thick paraffin sections and stained with hematoxylin-eosin (HE).  
123 The analysis included villus thickness, villus height and crypt depth and was performed  
124 using a microscope equipped with a camera and connected to a computer with the  
125 appropriate software (Olympus, BX53, Cell<sup>^</sup>B software, Japan). Data were collected

126 from at least five randomly selected visible regions under the microscope. Mean  
127 values of three birds per group were calculated for the subsequent statistical analysis.

### 128 **RNA isolation**

129 The total RNA was extracted from the fat pad and liver tissue using TRIzol  
130 reagent (TakaRa, USA). The RNA quality and quantity were determined using a  
131 Nanodrop 2000 (Thermo Scientific, USA). The 260/280 absorption ratios of all  
132 extracted samples were between 1.8 and 2.0, and the RNA integrity was further  
133 analyzed using gel electrophoresis. The first-strand cDNA was immediately  
134 synthesized using the PrimeScript RT reagent kit (TakaRa, USA) following the  
135 manufacturer's instructions. The obtained cDNA was stored at -20 °C until the  
136 subsequent real-time PCR analysis.

### 137 **qRT-PCR analysis**

138 The primers used for target gene amplification were either designed using primer  
139 3.0 based on quail-related gene sequences or reported by specific references (**Table 3**).  
140  $\beta$ -actin was selected as the housekeeping gene to normalize the target gene expression.  
141 All primers in this study were synthesized by Tsingke Biotech (Chengdu, China). The  
142 specificity of each of the designed primers was checked via gel electrophoresis  
143 analysis and melting curve analysis during quantitative real-time PCR.

144 The relative quantification of all transcripts was performed using qRT-PCR with  
145 the Bio-Rad CFX96 Real-Time PCR System (Bio-Rad Laboratories, USA). Real-time



146 quantitative PCR was performed with SsoFast EvaGreen Supermix (Bio-Rad  
147 Laboratories, USA). A total volume of 10  $\mu$ l containing 5  $\mu$ l of SsoFast EvaGreen  
148 Supermix, 3  $\mu$ l of RNA-free water, 0.5  $\mu$ l of forward primer, 0.5  $\mu$ l of reverse primer,  
149 and 1  $\mu$ l of template cDNA was used. PCR amplification was carried out as follows:  
150 denaturation at 95  $^{\circ}$ C for 30 s, followed by 40 cycles at 95  $^{\circ}$ C for 5 s and a specific  
151 annealing temperature of 55  $^{\circ}$ C for 30 s. The  $2^{-\Delta\Delta CT}$  method was used to evaluate the  
152 mRNA expression levels (25).

### 153 **Statistical analysis**

154 The statistical analysis was conducted using the SPSS software (SPSS, IBM,  
155 version 20). The standard error of the means (SEM) was obtained from the analysis of  
156 variance (ANOVA) that was conducted. The significance of the differences among  
157 means was determined using one-way ANOVA and compared using Dunnett's  
158 multiple range tests. The results were considered statistically significant at  $P>0.05$ .

## 159 **Results**

### 160 **Jejunum morphology**

161 In this study, all birds purchased from the local farm at the age of 90 days were  
162 no different from the normal farmed birds. The jejunum morphology analysis was  
163 performed in week 8 (**Table 4; Fig. 1-I**). Compared to control, the intestinal wall  
164 thickness was significantly increased in the MIC groups; it was approximately 79  $\mu$ m  
165 and thus extremely thicker than that in the other groups ( $P<0.01$ ). Meanwhile, The

166 villus height showed a significant increase both in MIC and IPF groups. Group MH  
167 and ML showed a clear enhancement of the intestinal wall, villus height and crypt  
168 depth. In addition, the intestinal wall thickness was 43  $\mu\text{m}$  in the IPF groups, similar  
169 to the control group (41  $\mu\text{m}$ ), and in contrast to the increased villus height, the crypt  
170 depth was decreased.

### 171 **Yolk cholesterol and fatty acids**

172 The results of the yolk cholesterol and triglycerides determination are shown in  
173 **Table 5**. In this study, compared to the control, the groups with lower amount of  
174 additive showed a decrease in the yolk cholesterol content, but there were no effects  
175 on the triglycerides. A decrease in yolk cholesterol was observed in groups ML and IL  
176 compared to the control ( $P<0.01$ ), while the 5% groups (MH and IH) showed no  
177 significant change. In addition, the most significant yolk cholesterol decline was  
178 observed in group ML.

179 In our study, both the MIC and IPF contained few lipids (**Table 1**). The  
180 conjugated linoleic acid content was in agreement with the results of Yang et al. (2):  
181 68.64% in IPF oil and 72.21% in MIC oil (**Table 6**). The composition of the yolk fatty  
182 acids is shown in **Table 7**.

183 As shown in **Table 7**, the n6/n3 (n3-polyunsaturated fatty acids/  
184 n6-polyunsaturated fatty acids) ratio was significantly higher in IPF groups than in the  
185 control ( $P<0.01$ ). Conversely, compared to the control, the decrease in the n6/n3 ratio  
186 in group MH was significant ( $P<0.01$ ), and group MH also showed an increased n3

187 (EPA: eicosapentaenoic acid; DHA: docosahexaenoic acid) content and decreased n6  
188 content, which are beneficial to the absorption of unsaturated fatty acid (26).

### 189 **Egg production and quality**

190 The effects of MIC and IPF dietary supplements on quail eggs were measured  
191 (**Table 8**). The yolk weight, shell thickness, Haugh unit and diameter ratio were  
192 similar among the groups. The yolk weight was approximately 0.29-0.33% of the total  
193 weight of the egg, the shell thickness was 0.16-0.18 mm, the Haugh unit was 79-84,  
194 and the diameter ratio was 0.77-0.82.

195 Egg production in the MIC groups generally increased during the whole  
196 experiment period compared to the control (**Table 9**). Group ML achieved a  
197 significant increase in egg mass and laying rate laying rate on average, higher than  
198 control group during the same period of time. The average egg mass in group ML was  
199 9.77 g/d/bird, which was significantly higher than that in the other groups. In contrast,  
200 the egg mass decreased in the IPF groups; group IH (5% IPF added) exhibited a  
201 significant production decrease that was more clear in the last week compared to the  
202 control (6.06 g/d/bird;  $P < 0.01$ ). Meanwhile, laying rate laying rate in the MIC groups  
203 generally increased during the whole experiment period compared to the control, and  
204 decreased laying rate laying rate was observed in the IPF groups (**Table 9**). Similarly,  
205 group ML achieved a significant increase in laying rate laying rate, at 87.7% on  
206 average, which is approximately 12% above the control. In group ML, nearly 44 eggs  
207 per day were produced on average, while the control group produced 38 eggs per day

208 during the same period of time.

## 209 **Genes**

210 The relative mRNA expression level changes in SRBEP-1, SREBP-2, ATGL,  
211 APOVLDL-II, which are involved in fatty acid and cholesterol biosynthesis were  
212 measured. The relative mRNA expression of group ML and IL were showed in **Fig.**  
213 **1(II, III, IV)**. Group ML and group IL are showed similar relative mRNA expression  
214 changes. Compared to the control, both ML and IL groups showed significant  
215 up-regulation of APOVLDL-II in liver (**Fig. 1-III**,  $P<0.01$ ). SREBP-1 was  
216 up-regulated in the fat pad ( $P<0.01$ ) but did not significantly change in the liver, while  
217 SREBP-2 was significantly down-regulated in the fat pad and up-regulated in the liver.  
218 However, the up-regulation of ATGL was found in ML.

## 219 **Discussion**

220 In the poultry industry, the wide use of antibiotics usually results in a thinner  
221 intestinal wall, smaller total villus area, and shorter villus height and crypt depth (27).  
222 In this study, all birds purchased from the local farm at the age of 90 days were no  
223 different from the normal farmed birds. The intestinal wall thickness was significantly  
224 increased in the MIC groups; it was approximately 79  $\mu\text{m}$  and thus extremely thicker  
225 than that in the other groups ( $P<0.01$ ). The villus height of both MIC and IPF groups  
226 showed a significant increase, and this increase may related to the activation of  
227 intestinal villi growth (28). MIC groups showed a clear enhancement of the intestinal

228 wall, villus height, suggesting that the birds of MIC groups have better digestive and  
229 absorptive capacity, and the appropriate amount of MIC additive was beneficial for  
230 the intestinal health of laying quails. However, IPF showed no effect on the intestinal  
231 wall, the intestinal wall thickness was 43  $\mu\text{m}$  in the IPF groups, similar to the control  
232 group (41  $\mu\text{m}$ ).

233 MIC and IPF supplementation also changed the cholesterol content of egg.  
234 Cholesterol is important for many physiological functions (29-31), and as a  
235 triglyceride, cholesterol is also an essential material for yolk formation and egg  
236 production. However, high cholesterol intake must be avoided in our diet because  
237 excess cholesterol is related to cardiovascular disease and nonalcoholic steatohepatitis  
238 which contributing to hepatocellular carcinoma, thus increasing the risk to human  
239 health (32-34). Moreover, cholesterol content is used in the evaluation of egg quality  
240 in the poultry industry. From the perspective of human health, eggs with lower  
241 cholesterol are considered to have superior quality, and more attention is currently  
242 paid to reducing egg cholesterol (35, 36). In this study, compared to the control, the  
243 groups with lower amount of additive showed a decrease in the yolk cholesterol  
244 content, but there were no effects on the triglycerides. The most significant yolk  
245 cholesterol decline was observed in group ML. These results indicate that both MIC  
246 and IPF were effective in terms of affecting the yolk cholesterol, and the optimal  
247 addition is 1%.

248 Ouyang et al. found that a different oil supplement given to hens was able to  
249 change the cholesterol and polyunsaturated fatty acid content in the yolk (37).

250 Furthermore, in a study conducted by Aydin et al., dietary conjugated linoleic acid  
251 (CLA) added to hen diets significantly changed the fatty acid composition of the yolk  
252 (38). In our study, both the MIC and IPF contained few lipids (**Table 1**). The  
253 conjugated linoleic acid content was in agreement with the results of Yang et al (2),  
254 and this small amount of CLA might be involved in the change of bird partly (**Table**  
255 **6**).

256 n-3 polyunsaturated fatty acids and n-6 polyunsaturated fatty acids is  
257 indispensable fatty acid for human(39). It is well known that a lower n6/n3 ratio is  
258 better according to the guidelines of the WHO regarding healthy food for humans (26).  
259 As shown in **Table 7**, compared to the control, the decrease in the n6/n3 ratio in group  
260 A was significant ( $P<0.01$ ), and group MH also showed an increased n3 (EPA:  
261 eicosapentaenoic acid; DHA: docosahexaenoic acid) content and decreased n6 content,  
262 which are beneficial to the absorption of unsaturated fatty acid (26). Conversely, the  
263 n6/n3 ratio was significantly higher in IPF groups than in the control ( $P<0.01$ ).

264 As we know that both fatty acid and cholesterol metabolism are involved in the  
265 regulation of egg formation (40, 41), and lipid mobilization from the adipose tissue is  
266 one of the main sources supporting the onset of egg production. As a result of lipid  
267 mobilization, the increase in the fat pad is the most intuitive indication of a supply of  
268 raw material available for egg production (42). The relative mRNA expression level  
269 changes in SRBEP-1, SREBP-2, ATGL, APOVLDL-II, which are involved in fatty  
270 acid and cholesterol biosynthesis (43-45), were measured at the end of the study.

271 Adipose triglyceride lipase (ATGL) is highly expressed in adipose tissue and

272 catalyzes the initial step of triglyceride hydrolysis (46). In a study conducted by Chen  
273 et al., G0/G1 switch gene 2 (G0S2) overexpression carried out the inhibition of ATGL  
274 expression, which resulted in a delayed laying onset and reduced egg production (40).  
275 Sterol regulatory element-binding protein-1 and -2 (SREBP-1 and SREBP-2) are  
276 SREBPs encoding genes that mainly regulate the homeostasis of lipids and  
277 cholesterol, respectively (43, 47). SREBP-1 up-regulation preferentially enhances  
278 fatty acid and triglyceride synthesis, while increased SREBP-2 expression promotes  
279 cholesterol synthesis (48-50). Apo very low density lipoprotein II (APOVLDL-II) is  
280 related to the secretion of VLDL, which plays a pivotal role in egg formation (19).  
281 The described changes in the fat pad and ATGL expression found in the study by  
282 Chen et al (40) were also observed in our study (**Fig. 1-III**).

283 In this study, the interclavicular fat pad weight significantly decreased in both the  
284 MIC-added and IPF-added groups. In group ML, for example, while the fat pad  
285 decreased, the ATGL was up-regulated, that is, the lipid supply for egg formation was  
286 enhanced. Meanwhile, as the results show in **Fig. 1(III, IV)**, we found that fatty acid  
287 synthesis was strengthened in the fat pad with the up-regulation of SREBP-1 and that  
288 the synthesis and transport of cholesterol was enhanced in the liver with the  
289 up-regulation of SREBP-2 and APOVLDL-II. In addition, the described jejunum  
290 morphology results indicate that the birds in group ML had better intestine health,  
291 which allowed better digestion and absorption. These changes indicate that the birds  
292 in group ML have enhanced energy requirement and material supplementation for egg  
293 production during the feeding period (**Fig. 2**). Hence, in the last week, MIC promoted

294 the egg quantity, but the single egg weight was lighter due to the fixed diet, just as the  
295 results showed in group ML. These results indicate that while the raw-material  
296 supplement supplied for the production of eggs was enhanced in the MIC groups, with  
297 an improvement in product performance, the fixed diet cannot meet the requirements  
298 of gradually increasing performance.

299 Moreover, the same tendency in gene expression was found in both groups ML  
300 and IL, combined with the change in the fat pad, we assumed that IPF facilitated  
301 several processes involved in egg production, although it ultimately resulted in some  
302 damage to body health. However, based on the results, we believe that *candida utilis*  
303 could help to reduce the disadvantage of IPF which was harmful to the laying quails  
304 and that MIC, a product of fermentation, was beneficial to intestinal health and could  
305 enhance the production capacity of laying quails. Meanwhile, the groups with a lower  
306 MIC amount (1%) showed that these amounts were more effective in promoting  
307 laying rate laying rate and egg mass. Furthermore, the results also suggest that through  
308 solid-state fermentation, IPF, which is not suitable for direct feeding, could be a good  
309 feed additive.

310 Overall, our study showed that MIC improved egg production and quality in  
311 laying quails. This study is showing the application of *Idesia polycarpa* fruit and  
312 *candida utilis* in feeding. MIC at 1% is the most efficient dosage not only in terms of  
313 an increase in egg production but also a decrease in yolk cholesterol. Meanwhile,  
314 adding 5% MIC could result in a higher EPA and DHA content and a better n3/n6  
315 ratio. Furthermore, MIC was beneficial to the health of the quail's intestine and



316 reduced the potential negative effects of industrial feeding.

317

318

## ■ Acknowledgements

319 This study was funded by Miaozi project in Science and Technology Innovation  
320 Program of Sichuan Province (2015MZGC001); Sichuan Science and Technology  
321 plan project (2016NZYZF0102).

## 322 Notes

323 The authors declare no competing financial interest.

## ■ REFERENCE

- 324 1. Wang QY, Li X, Du KF, Yao S, Song H. Conjugated Linoleic Acid Production by Alkali Isomerization  
325 of Linoleic Acid from *Idesia polycarpa* Maxim. var. *vestita* Diels Oil. *Asian Journal of Chemistry*.  
326 2013;25(7):3744-8.
- 327 2. Yang F-X, Su Y-Q, Li X-H, Zhang Q, Sun R-C. Preparation of biodiesel from *Idesia polycarpa* var.  
328 *vestita* fruit oil. *Industrial Crops and Products*. 2009;29(2-3):622-8.
- 329 3. Ye Y, Jia RR, Tang L, Chen F. In Vivo Antioxidant and Anti-Skin-Aging Activities of Ethyl Acetate  
330 Extraction from *Idesia polycarpa* Defatted Fruit Residue in Aging Mice Induced by D-Galactose.  
331 Evidence-based complementary and alternative medicine : eCAM. 2014;2014:185716. PubMed PMID:  
332 24971146. Pubmed Central PMCID: 4058274.
- 333 4. Lee M, Lee HH, Lee JK, Ye SK, Kim SH, Sung SH. Anti-adipogenic activity of compounds isolated  
334 from *Idesia polycarpa* on 3T3-L1 cells. *Bioorganic & medicinal chemistry letters*. 2013 Jun  
335 1;23(11):3170-4. PubMed PMID: 23628332.
- 336 5. Ye Y, Tang X-S, Chen F, Tang L. Optimization of Phenolics Extracted from *Idesia polycarpa* Defatted  
337 Fruit Residue and Its Antioxidant and Depigmenting Activity In Vitro and In Vivo. *Evidence-Based*  
338 *Complementary and Alternative Medicine*. 2014;2014:1-12.
- 339 6. Thom C, Church MB. *Aspergillus flavus*, *A. oryzae*, and Associated Species. *American Journal of*  
340 *Botany*. 1921;8(2):103-26.
- 341 7. Curtis RS. Feeding fermented cotton-seed meal to hogs. 1909.
- 342 8. Hati S, Patel N, Mandal S. Comparative Growth Behaviour and Biofunctionality of Lactic Acid  
343 Bacteria During Fermentation of Soy Milk and Bovine Milk. *Probiotics and antimicrobial proteins*. 2018  
344 Jun;10(2):277-83. PubMed PMID: 28455690.
- 345 9. Wang J, Cao F, Su E, Zhao L, Qin W. Improvement of Animal Feed Additives of Ginkgo Leaves  
346 through Solid-state Fermentation using *Aspergillus niger*. *International journal of biological sciences*.  
347 2018;14(7):736-47. PubMed PMID: 29910684. Pubmed Central PMCID: 6001676.
- 348 10. Dwivedi M, Yajnanarayana VK, Kaur M, Sattur AP. Evaluation of anti nutritional factors in fungal  
349 fermented cereals. *Food Science and Biotechnology*. 2015;24(6):2113-6.
- 350 11. Li C-Y, Lu J-J, Wu C-P, Lien T-F. Effects of probiotics and bromelain fermented soybean meal

- 351 replacing fish meal on growth performance, nutrient retention and carcass traits of broilers. *Livestock*  
352 *Science*. 2014;163:94-101.
- 353 12. Karásková K, Suchý P, Straková E. Current use of phytogetic feed additives in animal nutrition: a  
354 review. *Czech Journal of Animal Science*. 2016;60(No. 12):521-30.
- 355 13. Hong KJ, Lee CH, Kim SW. *Aspergillus oryzae* GB-107 fermentation improves nutritional quality of  
356 food soybeans and feed soybean meals. *Journal of Medicinal Food*. 2004;7(4):430-5.
- 357 14. Buerth C, Tielker D, Ernst JF. *Candida utilis* and *Cyberlindnera (Pichia) jadinii*: yeast relatives with  
358 expanding applications. *Applied microbiology and biotechnology*. 2016 Aug;100(16):6981-90. PubMed  
359 PMID: 27357226.
- 360 15. Boze HLN, Moulin G, Galzy P. Production of Food and Fodder Yeasts. *Critical Reviews in*  
361 *Biotechnology*. 1992;12(1-2):65-86.
- 362 16. Lawford GR, Kligerman A, Williams T, Lawford HG. Production of high - quality edible protein  
363 from *Candida* yeast grown in continuous culture. *Biotechnology & Bioengineering*.  
364 2010;21(7):1163-74.
- 365 17. Aba P, Eneasato C, Onah J. Effect of Quail Egg Pretreatment on the Lipid Profile and  
366 Histomorphology of the Liver of Acetaminophen-Induced Hepatotoxicity in Rats. *Journal of Applied*  
367 *Biology and Biotechnology*. 2016:034-8.
- 368 18. Ibukun EO, Oladipo GO. Lipidomic Modulation in Stressed Albino Rats Is Altered by Yolk and  
369 Albumen of Quail (*Coturnix japonica*) Egg and Poultry Feed. *Biochemistry Research International*.  
370 2016;2016(2):1-7.
- 371 19. .!!! INVALID CITATION !!!
- 372 20. Chah CC, Nelson RA, Carlson CW, Semeniuk G, Palmer IS, Hesseltine CW. Fungus-fermented  
373 soybeans benefit the life cycle of Japanese quail (*Coturnix coturnix japonica*). *Poultry Science*.  
374 1976;55(3):975-81.
- 375 21. Hong H, Abanto OD, Kim KH, Nam KT, Son JY, Jung WS, et al. The Effects of Dietary Soybean  
376 Fermented with *Aspergillus oryzae* or *Bacillus natto* on Egg Production and Egg Lipid Composition in  
377 Layer. *Hanguk chugsan sigpum haghoeji = Korean journal for food science of animal resources*.  
378 2010;30(4):609-16.
- 379 22. Kanyinji F, Moonga M. Effects of replacing maize meal with rumen filtrate-fermented cassava  
380 meal on growth and egg production performance in Japanese quails (*Cortunix japonica*). *Journal of*  
381 *Advanced Veterinary & Animal Research*. 2014;1(3):100-6.
- 382 23. Alagawany M, Farag MR, El-Hack MEA, Dhama K. The Practical Application of Sunflower Meal in  
383 *Poultry Nutrition*. *Advances in Animal & Veterinary Sciences*. 2015;19:323-7.
- 384 24. Ulberth F. One-step extraction/methylation method for determining the fatty acid composition of  
385 processed foods. *Journal of the American Oil Chemists' Society*. 1992;69(2):174-7.
- 386 25. Livak KJ, Schmittgen TD. Analysis of relative gene expression data using real-time quantitative  
387 PCR and the 2(-Delta Delta C(T)) Method. *Methods*. 2001;25(4):402-8.
- 388 26. Kris-Etherton PM, Innis S, Association AD, Canada DO. Position of the American Dietetic  
389 Association and Dietitians of Canada: dietary fatty acids. *Journal of the American Dietetic Association*.  
390 2007;107(9):1599-611.
- 391 27. Miles RD, Butcher GD, Henry PR, Littell RC. Effect of antibiotic growth promoters on broiler  
392 performance, intestinal growth parameters, and quantitative morphology. *Poultry Science*.  
393 2006;85(3):476-85.
- 394 28. Afsharmanesh M, Sadaghi B. Effects of dietary alternatives (probiotic, green tea powder, and

- 395 Kombucha tea) as antimicrobial growth promoters on growth, ileal nutrient digestibility, blood  
396 parameters, and immune response of broiler chickens. *Comparative Clinical Pathology*.  
397 2013;23(3):717-24.
- 398 29. Navigio D, Gallo M, Grottaglie LL, Scala C, Ferrara L, Santini A. Determination of cholesterol in  
399 Italian chicken eggs. *Food chemistry*. 2012;132(2):701-8.
- 400 30. Schroeder F, Jefferson JR, Kier AB, Knittel J, Scallen TJ, Wood WG, et al. Membrane cholesterol  
401 dynamics: cholesterol domains and kinetic pools. *Proceedings of the Society for Experimental Biology  
402 & Medicine Society for Experimental Biology & Medicine*. 1991;196(3):235-52.
- 403 31. Simons K, Ikonen E. How cells handle cholesterol. *Science*. 2000;290(5497):1721-6.
- 404 32. Liang JQ, Teoh N, Xu L, Pok S, Li X, Chu ESH, et al. Dietary cholesterol promotes steatohepatitis  
405 related hepatocellular carcinoma through dysregulated metabolism and calcium signaling. *Nature  
406 communications*. 2018 Oct 26;9(1):4490. PubMed PMID: 30367044. Pubmed Central PMCID: 6203711.
- 407 33. Ahn J, Lim U, Weinstein SJ, Schatzkin A, Hayes RB, Virtamo J, et al. Prediagnostic Total and  
408 High-Density Lipoprotein Cholesterol and Risk of Cancer. *Cancer Epidemiology Biomarkers &  
409 Prevention*. 2009;18(11):2814-21.
- 410 34. Detection EPO. Executive Summary of The Third Report of The National Cholesterol Education  
411 Program (NCEP) Expert Panel on Detection, Evaluation, And Treatment of High Blood Cholesterol In  
412 Adults (Adult Treatment Panel III). *Jama*. 2001;285(19):2486-97.
- 413 35. Lamas A, Anton X, Miranda JM, Roca-Saavedra P, Cardelle-Cobas A, Ibarra IS, et al. Technological  
414 Strategies for the Development of Egg-Derived Products with Reduced Content of Cholesterol. *Food  
415 and Bioprocess Technology*. 2016;9(1):81-90.
- 416 36. Mattioli S, Bosco AD, Martino M, Ruggeri S, Marconi O, Sileoni V, et al. Alfalfa and flax sprouts  
417 supplementation enriches the content of bioactive compounds and lowers the cholesterol in hen egg.  
418 *Journal of Functional Foods*. 2016;22:454-62.
- 419 37. Ouyang K, Wang W, Xu MS, Jiang Y, Sangguan X. Effects of different oils on the production  
420 performances and polyunsaturated fatty acids and cholesterol level of yolk in hens. *Asian Australasian  
421 Journal of Animal Sciences*. 2004;17(17):843-7.
- 422 38. Aydin R, Cook ME. The effect of dietary conjugated linoleic acid on egg yolk fatty acids and  
423 hatchability in Japanese quail. *Poultry Science*. 2004;83(12):2016-22.
- 424 39. Bird JK, Calder PC, Eggersdorfer M. The Role of n-3 Long Chain Polyunsaturated Fatty Acids in  
425 Cardiovascular Disease Prevention, and Interactions with Statins. *Nutrients*. 2018;10(6).
- 426 40. Chen PR, Shin S, Choi YM, Kim E, Han JY, Lee K. Overexpression of G0/G1 Switch Gene 2 in  
427 Adipose Tissue of Transgenic Quail Inhibits Lipolysis Associated with Egg Laying. *International journal  
428 of molecular sciences*. 2016 Mar 15;17(3):384. PubMed PMID: 26999108. Pubmed Central PMCID:  
429 4813241.
- 430 41. Wu J, Fu W, Huang Y, Ni Y, Zhao R. Kisspeptin-10 enhanced egg production in quails associated  
431 with the increase of triglyceride synthesis in liver. *Asian-Australasian journal of animal sciences*. 2013  
432 Aug;26(8):1080-8. PubMed PMID: 25049888. Pubmed Central PMCID: 4093219.
- 433 42. Yang S, Suh Y, Choi YM, Shin S, Han JY, Lee K. Loss of Fat with Increased Adipose Triglyceride  
434 Lipase-Mediated Lipolysis in Adipose Tissue During Laying Stages in Quail. *Lipids*. 2013;48(1):13-21.
- 435 43. Brown MS, Goldstein JL. The SREBP Pathway: Regulation of Cholesterol Metabolism by  
436 Proteolysis of a Membrane-Bound Transcription Factor. *Cell*. 1997;89(3):331-40.
- 437 44. Hermansson M, Hanninen S, Hokynar K, Somerharju P. The PNPLA-family phospholipases  
438 involved in glycerophospholipid homeostasis of HeLa cells. *Biochimica et biophysica acta*. 2016

- 439 Sep;1861(9 Pt A):1058-65. PubMed PMID: 27317427.
- 440 45. Zheng W, Mast N, Saadane A, Pikuleva IA. Pathways of cholesterol homeostasis in mouse retina  
441 responsive to dietary and pharmacologic treatments. *Journal of Lipid Research*. 2014;56(1):81-97.
- 442 46. Zimmermann R, Zechner R. Fat Mobilization in Adipose Tissue Is Promoted by  
443 Adipose Triglyceride Lipase. *Science*. 2004;306(5700):1383-6.
- 444 47. Eberlé D, Hegarty B, Bossard P, Ferré P, Foufelle F. SREBP transcription factors: master regulators  
445 of lipid homeostasis. *Biochimie*. 2004;86(11):839-48.
- 446 48. Dong X, Xu H, Mai K, Xu W, Zhang Y, Ai Q. Cloning and characterization of SREBP-1 and  
447 PPAR-alpha in Japanese seabass *Lateolabrax japonicus*, and their gene expressions in response to  
448 different dietary fatty acid profiles. *Comparative biochemistry and physiology Part B, Biochemistry &*  
449 *molecular biology*. 2015 Feb;180:48-56. PubMed PMID: 25448051.
- 450 49. Li X, Li Y, Yang W, Xiao C, Fu S, Deng Q, et al. SREBP-1c overexpression induces triglycerides  
451 accumulation through increasing lipid synthesis and decreasing lipid oxidation and VLDL assembly in  
452 bovine hepatocytes. *The Journal of steroid biochemistry and molecular biology*. 2014 Sep;143:174-82.  
453 PubMed PMID: 24565561.
- 454 50. Park J, Yeom M, Hahm DH. Fucoïdan improves serum lipid levels and atherosclerosis through  
455 hepatic SREBP-2-mediated regulation. *Journal of pharmacological sciences*. 2016 Jun;131(2):84-92.  
456 PubMed PMID: 27094367.
- 457
- 458

## Tables

**Table 1. The Main Nutrients of MIC, IPF and Basal diet (%)**

|                  | MIC  | IPF   | Basal diet |
|------------------|------|-------|------------|
| Crude protein    | 16.4 | 8.49  | 21         |
| Crude lipid      | 6.34 | 13.34 | 2.5        |
| Moisture content | 5.04 | 7.20  | 14         |
| Ash              | 4.62 | 4.49  | 12         |
| Free Amino acid  | 6.81 | 5.01  |            |
| Lysine           | 0.13 | 0.09  |            |
| Methionine       | 0.11 | 0.05  | 0.46       |
| Phenylalanine    | 0.36 | 0.27  |            |
| Threonine        | 0.31 | 0.23  |            |
| Leucine          | 0.57 | 0.44  |            |
| Isoleucine       | 0.34 | 0.26  |            |
| Arginine         | 0.35 | 0.15  |            |
| Histidine        | 0.30 | 0.23  |            |
| Valine           | 0.42 | 0.33  |            |

**MIC:** means Mixture of *Idesia polycarpa* defatted fruit and candida utilis; **IPF:** means *Idesia polycarpa* defatted fruit.

**Table 2. Daily Diet Arrangement of MIC, IPF and Control Groups (g)**

|         | Week 0 to 2 |     |     | Week 3 to 8 |     |     |
|---------|-------------|-----|-----|-------------|-----|-----|
|         | Basal diet  | MIC | IPF | Basal diet  | MIC | IPF |
| MH      | 1000        | 0.5 | -   | 950         | 50  | -   |
| ML      | 1000        | 0.5 | -   | 990         | 10  | -   |
| IH      | 1000        | 0.5 | -   | 950         | -   | 50  |
| IL      | 1000        | 0.5 | -   | 990         | -   | 10  |
| Control | 1000        | 0.5 | -   | 1000        | -   | -   |

<sup>1</sup>**MIC:** means Mixture of *Idesia polycarpa* defatted fruit and candida utilis; **IPF:** means *Idesia polycarpa* defatted fruit.

<sup>2</sup>**MH:** Basal diet supplemented with 5% MIC, **ML:** basal diet supplemented with 1% MIC, **IH:** basal diet supplemented with 5% IPF, **IL:** basal diet supplemented with 1% IPF, **Control:** Control group, base diet only.

<sup>4</sup>Superscripts **a, b, c, d, e:** Means within the same superscripts without the same row are significantly different (P<0.05).

**Table 3. Primer Sequences for the mRNA Expression Analysis of Genes**

| Genes          | primer sequence (5'-3')     | product size (bp) | Gene Bank   |
|----------------|-----------------------------|-------------------|-------------|
| APOVLDL-I      | F: CAGTTCTTGCTGGATGTTCCAGAC | 430               | S82591.1    |
| I              | R: CAATGGCCAAGTCATTCAGGAGGA |                   |             |
| SREBP-1        | F: CTACCGCTCATCCATCAACG     | 181               | NC_029529.1 |
|                | R: CTGCTTCAGCTTCTGGTTGC     |                   |             |
| SREBF-2        | F: CCCAGAACAGCAAGCAAGG      | 108               | XM_416222   |
|                | R: GCGAGGACAGGAAAGAGAGTG    |                   |             |
| ATGL           | F: CAGCAGGACGGTTGGGTATTTTC  | 154               | GQ221783.1  |
|                | R: CCACGCAAGGTTGGAGGTATCA   |                   |             |
| $\beta$ -actin | F: TGATGGTTGGTATGGGTCAGAAAG | 92                | NC_029529   |
|                | R: ATGTTCAATGGGGTATTTCAAGGT |                   |             |

**Table 4. Jejunum Morphology Analysis of Laying Quails Fed a Basal Diet, MIC Added Diet or IPF Added Diet**

|                                     | MIC                |                    | IPF                |                    | Control            | SEM  | P     |
|-------------------------------------|--------------------|--------------------|--------------------|--------------------|--------------------|------|-------|
|                                     | MH<br>(5%)         | ML<br>(1%)         | IH<br>(5%)         | IL<br>(1%)         |                    |      |       |
| Intestine wall thickness ( $\mu$ m) | 78.5 <sup>a</sup>  | 79.2 <sup>a</sup>  | 43.7 <sup>b</sup>  | 43.4 <sup>b</sup>  | 41.3 <sup>b</sup>  | 6.09 | <0.01 |
| villous height ( $\mu$ m)           | 835 <sup>b</sup>   | 908 <sup>a</sup>   | 818 <sup>bc</sup>  | 801 <sup>c</sup>   | 610 <sup>d</sup>   | 26.9 | <0.01 |
| Crypt depth ( $\mu$ m)              | 112.8 <sup>b</sup> | 189.5 <sup>a</sup> | 72.9 <sup>d</sup>  | 77.0 <sup>d</sup>  | 91.5 <sup>c</sup>  | 4.35 | <0.01 |
| V/C                                 | 7.40 <sup>b</sup>  | 4.79 <sup>d</sup>  | 11.22 <sup>a</sup> | 10.41 <sup>a</sup> | 6.67 <sup>bc</sup> | 0.50 | <0.01 |

<sup>1</sup>N=9.

<sup>2</sup>**MIC**: means Mixture of *Idesia polycarpa* defatted fruit and candida utilis; **IPF**: means *Idesia polycarpa* defatted fruit.

<sup>3</sup> **V/C** means the ratio of villous length/crypt depth.

<sup>4</sup>**MH**: Basal diet supplemented with 5% MIC, **ML**: basal diet supplemented with 1% MIC, **IH**: basal diet supplemented with 5% IPF, **IL**: basal diet supplemented with 1% IPF, **Control**: Control group, base diet only.

<sup>4</sup>Superscripts **a, b, c, d, e**: Means within the same superscripts without the same row are significantly different (P<0.05).

**Table 5. Yolk Cholesterol and Triglyceride Content of Laying Quails Fed a Basal Diet, MIC Added Diet or IPF Added Diet**

|                             | MIC                 |                    | IPF                |                    | Control            | SEM  | P-value |
|-----------------------------|---------------------|--------------------|--------------------|--------------------|--------------------|------|---------|
|                             | MH<br>(5%)          | ML<br>(1%)         | IH<br>(5%)         | IL<br>(1%)         |                    |      |         |
| Yolk Weight<br>(g)          | 3.61                | 3.10               | 3.60               | 3.29               | 3.39               | 0.39 | 0.73    |
| Cholesterol<br>(mg/g yolk)  | 13.1 <sup>ab</sup>  | 12.1 <sup>b</sup>  | 14.0 <sup>a</sup>  | 11.2 <sup>b</sup>  | 14.5 <sup>a</sup>  | 0.25 | <0.01   |
| (mg/ yolk)                  | 46.54 <sup>ab</sup> | 37.0 <sup>c</sup>  | 48.5 <sup>ab</sup> | 40.3 <sup>b</sup>  | 49.1 <sup>a</sup>  | 4.73 | <0.01   |
| Triglyceride<br>(mg/g yolk) | 183                 | 175                | 197                | 183                | 190                | 8.57 | 0.10    |
| (mg/ yolk)                  | 660.2 <sup>a</sup>  | 536.0 <sup>b</sup> | 682.9 <sup>a</sup> | 661.4 <sup>b</sup> | 644.4 <sup>a</sup> | 69.2 | 0.01    |

<sup>1</sup>N=9.

<sup>2</sup>**MIC**: means Mixture of *Idesia polycarpa* defatted fruit and candida utilis; **IPF**: means *Idesia polycarpa* defatted fruit.

<sup>3</sup>**MH**: Basal diet supplemented with 5% MIC, **ML**: basal diet supplemented with 1% MIC, **IH**: basal diet supplemented with 5% IPF, **IL**: basal diet supplemented with 1% IPF, **Control**: Control group, base diet only.

<sup>4</sup>Superscripts **a, b, c, d, e**: Means within the same superscripts without the same row are significantly different (P<0.05).

**Table 6. Fatty Acid Composition of MIC Oil and IPF Oil (%)**

| Fatty Acid  |       | MIC   | IPF   |
|-------------|-------|-------|-------|
| Palmitic    | C16:0 | 15.51 | 17.36 |
| Stearic     | C18:0 | 1.79  | 1.66  |
| Oleic       | C18:1 | 3.5   | 4.54  |
| Palmitoleic | C16:1 | 6.41  | 7.55  |
| Linoleic    | C18:2 | 72.21 | 68.64 |

<sup>1</sup>**MIC**: means Mixture of *Idesia polycarpa* defatted fruit and candida utilis; **IPF**: means *Idesia polycarpa* defatted fruit.



**Table 7. Fatty Acid Composition of Yolk Oil extracted from each groups**

| Fatty acid          |           | Control           | MH                | ML                 | IH                | IL                 |
|---------------------|-----------|-------------------|-------------------|--------------------|-------------------|--------------------|
| Myristic            | C14:0     | 0.45 <sup>b</sup> | 0.57 <sup>a</sup> | 0.54 <sup>a</sup>  | 0.43 <sup>b</sup> | 0.39 <sup>b</sup>  |
| Palmitic            | C16:0     | 29.53             | 30.55             | 31.88              | 30.92             | 32.72              |
| Palmitoleic         | C16:1;n-7 | 2.16 <sup>c</sup> | 3.64 <sup>a</sup> | 2.39 <sup>bc</sup> | 2.82 <sup>b</sup> | 2.20 <sup>bc</sup> |
| Stearic             | C18:0     | 12.8 <sup>a</sup> | 11.6 <sup>b</sup> | 10.5 <sup>c</sup>  | 9.23 <sup>d</sup> | 10.6 <sup>c</sup>  |
| Oleic               | C18:1;n-9 | 33.8 <sup>b</sup> | 35.3 <sup>b</sup> | 34.6 <sup>b</sup>  | 37.2 <sup>a</sup> | 32.2 <sup>c</sup>  |
| Linoleic            | C18:2;n-6 | 17.1 <sup>b</sup> | 14.1 <sup>c</sup> | 16.7 <sup>b</sup>  | 16.8 <sup>b</sup> | 18.2 <sup>a</sup>  |
| $\alpha$ -Linolenic | C18:3;n-3 | 0.22 <sup>a</sup> | 0.21 <sup>a</sup> | 0.25 <sup>a</sup>  | 0.17 <sup>b</sup> | 0.22 <sup>a</sup>  |
| Arachidonic         | C20:4;n-6 | 2.56 <sup>a</sup> | 2.38 <sup>a</sup> | 1.88 <sup>b</sup>  | 1.65 <sup>b</sup> | 1.64 <sup>b</sup>  |
| Eicosapentaenoic    | C20:5;n-3 | 0.27 <sup>b</sup> | 0.37 <sup>a</sup> | 0.29 <sup>ab</sup> | 0.14 <sup>c</sup> | 0.25 <sup>b</sup>  |
| Docosahexaenoic     | C22:6;n-3 | 0.89 <sup>b</sup> | 1.02 <sup>a</sup> | 0.76 <sup>c</sup>  | 0.51 <sup>d</sup> | 0.48 <sup>d</sup>  |
| SFA                 |           | 42.8 <sup>a</sup> | 42.7 <sup>a</sup> | 42.9 <sup>a</sup>  | 40.6 <sup>b</sup> | 43.7 <sup>a</sup>  |
| MUFA                |           | 36.0 <sup>c</sup> | 38.9 <sup>b</sup> | 37.0 <sup>bc</sup> | 40.0 <sup>a</sup> | 34.4 <sup>d</sup>  |
| PUFA                |           | 21.0 <sup>a</sup> | 18.1 <sup>c</sup> | 19.8 <sup>b</sup>  | 19.3 <sup>b</sup> | 20.8 <sup>ab</sup> |
| n-3PUFA             |           | 1.38 <sup>b</sup> | 1.60 <sup>a</sup> | 1.30 <sup>b</sup>  | 0.82 <sup>c</sup> | 0.95 <sup>bc</sup> |
| n-6PUFA             |           | 19.6 <sup>a</sup> | 16.5 <sup>c</sup> | 18.5 <sup>b</sup>  | 18.4 <sup>b</sup> | 19.9 <sup>a</sup>  |
| n6/n3               |           | 14.2 <sup>c</sup> | 10.3 <sup>d</sup> | 14.3 <sup>c</sup>  | 22.5 <sup>a</sup> | 20.9 <sup>b</sup>  |

<sup>1</sup>N=3.

<sup>2</sup>**MIC**: means Mixture of *Idesia polycarpa* defatted fruit and candida utilis; **IPF**: means *Idesia polycarpa* defatted fruit.

<sup>3</sup>**MH**: Basal diet supplemented with 5% MIC, **ML**: basal diet supplemented with 1% MIC, **IH**: basal diet supplemented with 5% IPF, **IL**: basal diet supplemented with 1% IPF, **Control**: Control group (base diet);

<sup>4</sup>Superscripts **a, b, c, d, e** Means within the same superscripts without the same row are significantly different (P<0.05).

<sup>5</sup>**SFA**: short chain fatty acid; **MUFA**: monounsaturated fatty acid; **PUFA**: polyunsaturated fatty acids.

<sup>6</sup>All results in percentage terms.

**Table 8. Egg Quality of Laying Quails Fed a Basal Diet, MIC Added Diet or IPF Added Diet**

|                     | MIC        |            | IPF        |            | Control | SEM   | P-VALUE |
|---------------------|------------|------------|------------|------------|---------|-------|---------|
|                     | MH<br>(5%) | ML<br>(1%) | IH<br>(5%) | IL<br>(1%) |         |       |         |
| Yolk Weight (%)     |            |            |            |            |         |       |         |
| initial             | 0.30       | 0.30       | 0.31       | 0.30       | 0.31    | 0.187 | 0.980   |
| last week           | 0.31       | 0.30       | 0.33       | 0.31       | 0.29    | 0.029 | 0.935   |
| average             | 0.31       | 0.30       | 0.32       | 0.31       | 0.30    | 0.119 | 0.754   |
| Shell Thickness(mm) |            |            |            |            |         |       |         |
| Initial             | 0.16       | 0.16       | 0.16       | 0.17       | 0.16    | 0.007 | 0.785   |
| Last week           | 0.17       | 0.18       | 0.19       | 0.18       | 0.18    | 0.008 | 0.285   |
| Average             | 0.18       | 0.18       | 0.18       | 0.18       | 0.17    | 0.008 | 0.563   |
| Haugh Unit          |            |            |            |            |         |       |         |
| Initial             | 80.59      | 79.84      | 80.75      | 79.59      | 79.15   | 2.760 | 0.827   |
| Last week           | 79.25      | 81.18      | 79.86      | 80.42      | 80.78   | 1.881 | 0.924   |
| Average             | 82.92      | 81.51      | 84.75      | 81.26      | 80.81   | 1.437 | 0.458   |
| Diameter Ratio      |            |            |            |            |         |       |         |
| Initial             | 0.77       | 0.80       | 0.82       | 0.79       | 0.80    | 0.346 | 0.805   |
| Last week           | 0.77       | 0.78       | 0.78       | 0.78       | 0.79    | 0.082 | 0.285   |
| Average             | 0.78       | 0.77       | 0.79       | 0.78       | 0.77    | 0.007 | 0.269   |

<sup>1</sup>N=9.

<sup>2</sup>**MIC**: means Mixture of *Idesia polycarpa* defatted fruit and candida utilis; **IPF**: means *Idesia polycarpa* defatted fruit.

<sup>3</sup>**MH**, basal diet supplemented with 5% MIC; **ML**, basal diet supplemented with 1% MIC; **IH**, basal diet supplemented with 5% IPF; **IL**, basal diet supplemented with 1% IPF; **Control**, Control group (base diet).

<sup>4</sup>**Initial**: Mean of week 0 to 2; **Last week**: Mean of week 8; **Average**: Mean of week 3 to 8.

**Table 9. Egg Mass and Egg Production of Laying Quails Fed a Basal Diet, MIC Added Diet or IPF Added Diet**

|                     | MIC               |                   | IPF               |                   | Control            | SEM  | P-value |
|---------------------|-------------------|-------------------|-------------------|-------------------|--------------------|------|---------|
|                     | MH<br>(5%)        | ML<br>(1%)        | IH<br>(5%)        | IL<br>(1%)        |                    |      |         |
| Egg mass (g/d/bird) |                   |                   |                   |                   |                    |      |         |
| Initial             | 9.44 <sup>a</sup> | 9.41 <sup>a</sup> | 9.31 <sup>a</sup> | 9.14 <sup>a</sup> | 9.18 <sup>a</sup>  | 0.30 | 0.88    |
| Last week           | 9.18 <sup>a</sup> | 9.31 <sup>a</sup> | 6.04 <sup>c</sup> | 7.82 <sup>b</sup> | 9.27 <sup>ab</sup> | 0.30 | <0.01   |
| Average             | 9.41 <sup>a</sup> | 9.77 <sup>a</sup> | 6.06 <sup>d</sup> | 7.86 <sup>c</sup> | 8.87 <sup>b</sup>  | 0.38 | <0.01   |
| Laying rate (%)     |                   |                   |                   |                   |                    |      |         |
| Initial             | 81.0 <sup>a</sup> | 81.3 <sup>a</sup> | 80.7 <sup>a</sup> | 80.7 <sup>a</sup> | 79.3 <sup>a</sup>  | 2.57 | 0.97    |
| Last week           | 80.1 <sup>b</sup> | 90.2 <sup>a</sup> | 56.3 <sup>e</sup> | 68.1 <sup>d</sup> | 78.4 <sup>c</sup>  | 2.91 | <0.01   |
| Average             | 82.2 <sup>a</sup> | 87.7 <sup>a</sup> | 62.4 <sup>c</sup> | 72.3 <sup>b</sup> | 76.0 <sup>b</sup>  | 3.15 | <0.01   |

<sup>1</sup>N=50.

<sup>2</sup>**MIC**: means Mixture of *Idesia polycarpa* defatted fruit and candida utilis; **IPF**: means *Idesia polycarpa* defatted fruit.

<sup>3</sup> **MH**, basal diet supplemented with 5% MIC; **ML**, basal diet supplemented with 1% MIC; **IH**, basal diet supplemented with 5% IPF; **IL**, basal diet supplemented with 1% IPF; **Control**, Control group (base diet).

<sup>4</sup>Superscripts **a, b, c, d, e** Means within the same superscripts without the same row are significantly different (P<0.05).

<sup>5</sup>**Initial**: Mean of week 0 to 2; **Last week**: Mean of week 8; **Average**: Mean of week 3 to 8;

## Figures

**Fig. 1**

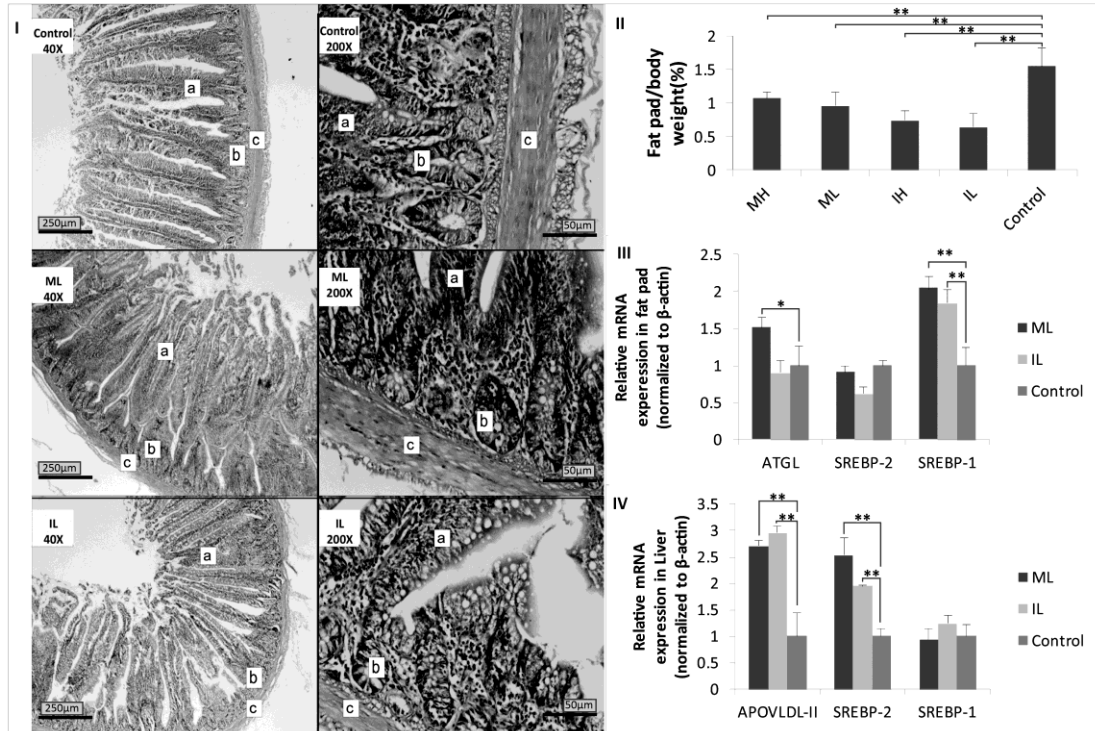

**Fig. 1 Results of jejunum morphology, fat pad, and relative mRNA expression.**

**I:** Tissue sections of jejunum. **ML:** the Tissue section figure of group ML; **IL:** the Tissue section figure of group IL; collected in 40 $\times$ amplifications and 200 $\times$ amplifications respectively.

**II:** Ratio of Fat Pad to Body Weight (%). **MH,** basal diet supplemented with 5% MIC; **ML,** basal diet supplemented with 1% MIC; **IH,** basal diet supplemented with 5% IPF; **IL,** basal diet supplemented with 1% IPF; **Control,** Control group (base diet). \*\*Means significant relative to control ( $P < 0.01$ ).

**III:** Relative mRNA expression of 1% MIC added group (**ML**) and 1%IPF added group (**IL**) in fat pad. \*\*Means significant relative to control ( $P < 0.01$ ); \*Means significant relative to Control ( $P < 0.05$ ).

**IV:** Relative mRNA expression of 1% MIC added group (**ML**) and 1%IPF added group (**IL**) in liver. \*\*Means significant relative to control ( $P < 0.01$ ).

**Fig. 2**

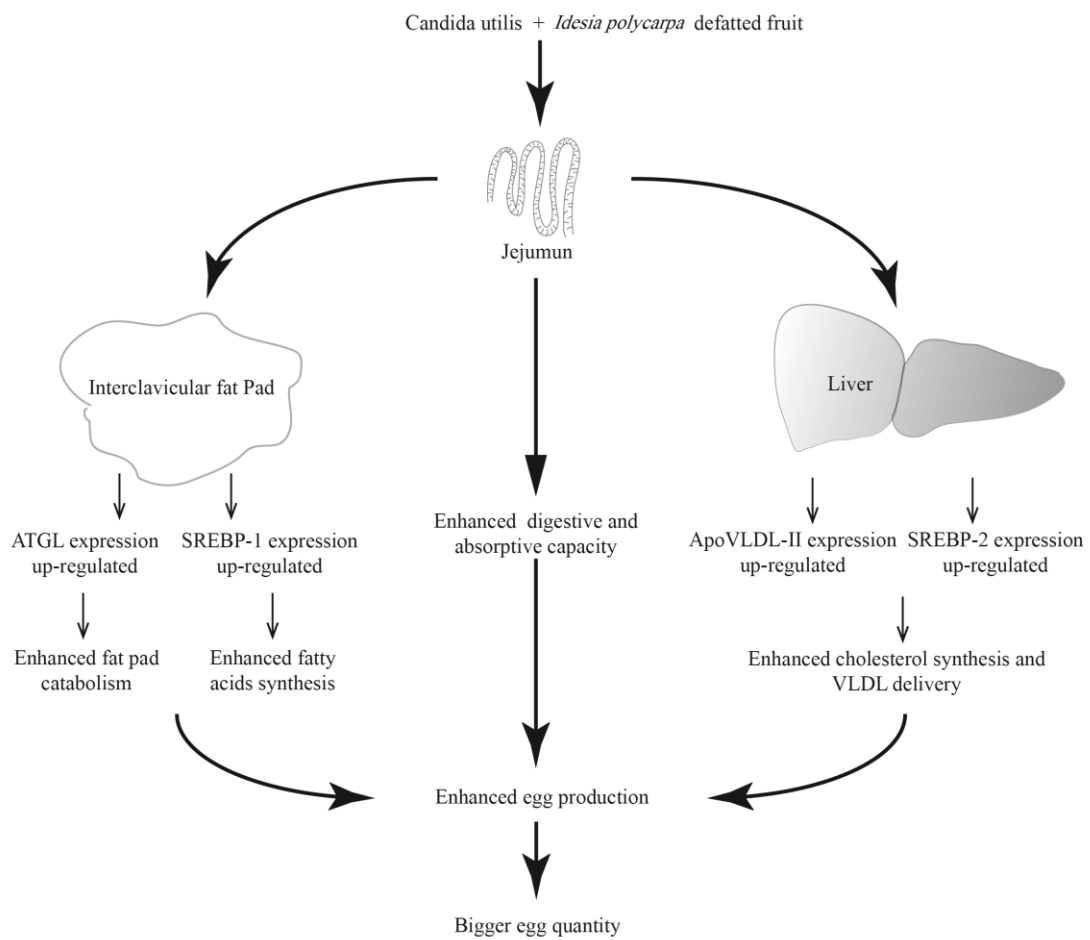

**Fig. 2** The influence of MIC in laying quails. Compared to the control, the intestine statuses of laying quails was significantly changed with the addition of MIC, as well as the relative mRNA expression in the fat pad and liver, ultimately, these changes result in an enhanced egg production.
